# Supplementary material for: Exploring genotype by environment interaction on cassava yield and yield related traits using classical statistical methods
Source: PubMed Central journal article supplement (PMC9292083; doi:10.1371/journal.pone.0268189), 2022-07-18
Supplement: pone.0268189.s004.pdf [file pone.0268189.s004.pdf]

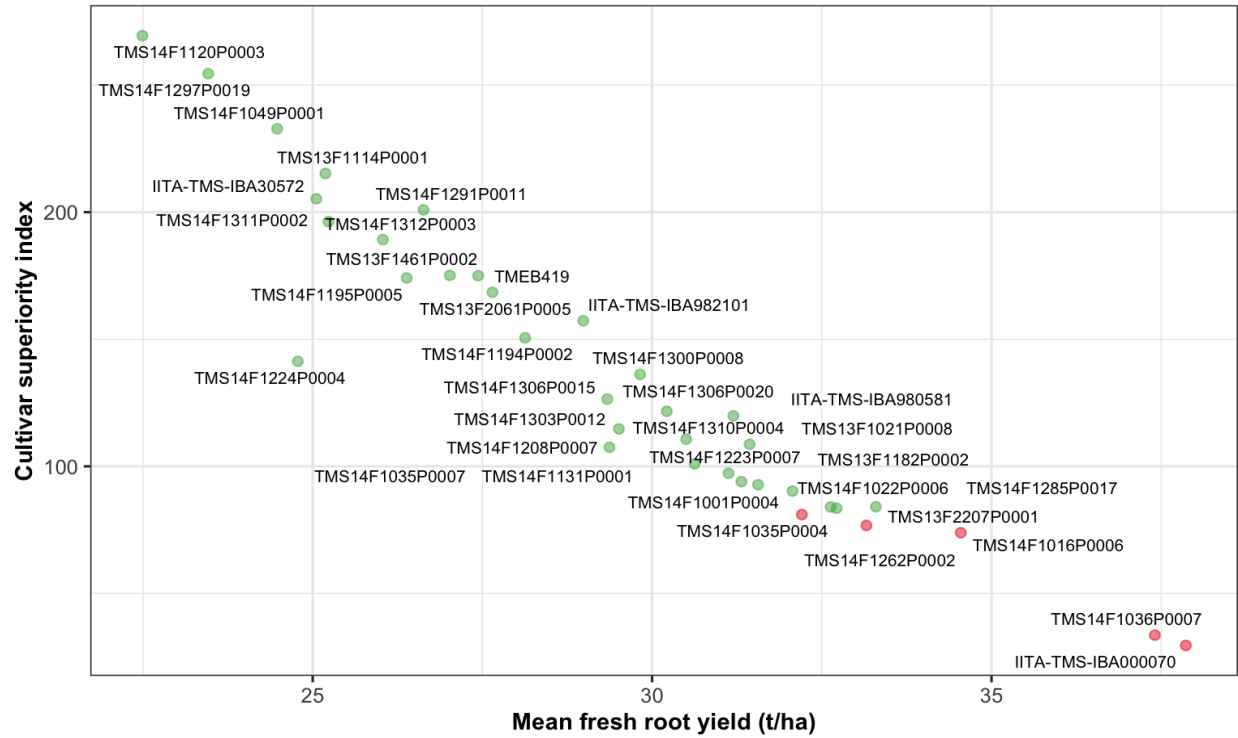

**S4 Fig.** Scatter plot showing cultivar superiority index versus mean fresh root yield of 36 cassava clonal lines. Clonal lines in red data points are high yielding and most stable across the testing environments
