# Supplementary material for: Exploring genotype by environment interaction on cassava yield and yield related traits using classical statistical methods
Source: PubMed Central journal article supplement (PMC9292083; doi:10.1371/journal.pone.0268189), 2022-07-18
Supplement: pone.0268189.s009.pdf [file pone.0268189.s009.pdf]

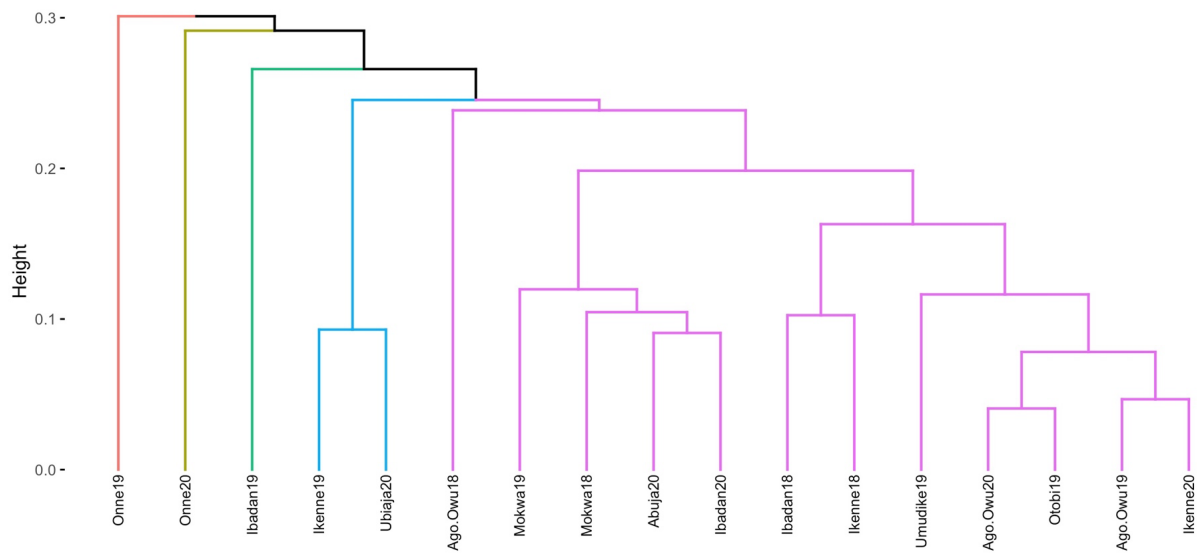

**S9 Fig.** A cluster dendrogram showing relatedness among the testing environments based on distance matrix derived from correlation among environments genotypic BLUPs of top yield. The clustering was based on ward.D2 linkage method.
